# Supplementary material
Source: publisher figshare collection journal article supplement (https://acs.figshare.com/ndownloader/files/9101209)
Supplement: Supplementary file 1 [file 9101209]

**Supporting Information**

**Reactive Intermediates or Inert Graphene? The  
Temperature and Pressure Determined Evolution  
of Carbon in the CH<sub>4</sub>–Ni(111) System**

*Kaidi Yuan<sup>1,2</sup>, Jian-Qiang Zhong<sup>3</sup>, Shuo Sun<sup>2</sup>, Yinjuan Ren<sup>4</sup>, Jia Lin Zhang<sup>4</sup>, Wei Chen<sup>1,2,4,\*</sup>*

1 National University of Singapore (Suzhou) Research Institute, 377 Linquan Street, Suzhou  
Industrial Park, Jiangsu 215123, China

2 Department of Physics, National University of Singapore, 2 Science Drive 3, 117542,  
Singapore

3 Center for Functional Nanomaterials, Brookhaven National Laboratory, Upton, New York  
11973, United States

4 Department of Chemistry, National University of Singapore, 3 Science Drive 3, 117543,  
Singapore

**Corresponding Author**

Associate Professor Wei Chen: [phycw@nus.edu.sg](mailto:phycw@nus.edu.sg)

1. Carbon coverage estimation

Table S1 shows the estimated coverage of carbon species of **Figure 1** in the main text. The calculation of “Normalized Area” is obtained through dividing the peak area by the background level and FWHM. The coverage (per Ni atom) is calculated through dividing the “Normalized Area” by 6.0, a factor obtained on the basis that the fully covered graphene (2 carbons per surface Ni) has the “Normalized Area” of 12.

Figure 1 of the main text

Table S1: Carbon Coverage Estimation

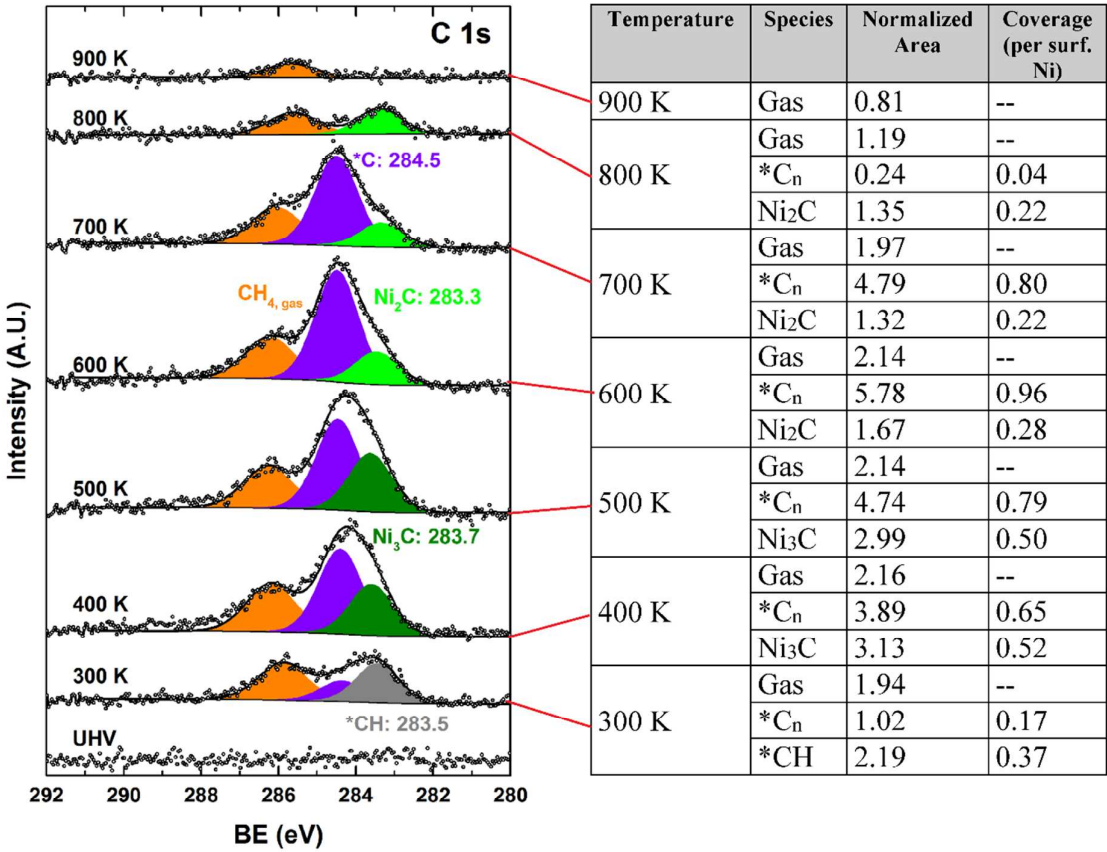

## 2. Ni 2p peak of clean and graphene-covered Ni(111)

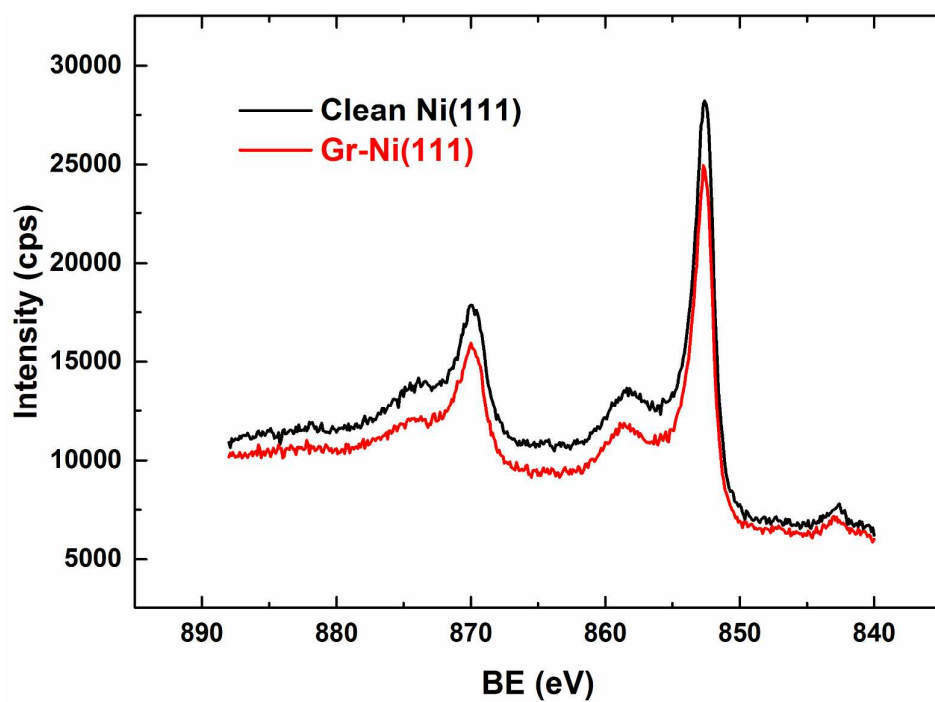

**Figure S1.** Ni 2p spectra of clean (black) and graphene covered (red) Ni(111). Both of them were measured in UHV, before CH<sub>4</sub> dosing or after the evacuation of CH<sub>4</sub>.

### 3. LEED Simulation for the clock reconstructed Ni<sub>2</sub>C

LEED simulation of the Ni<sub>2</sub>C structure was obtained by software “LEEDpat version 4.1”. A reflection symmetry was added by compositing the flipped image to the originally simulated image where only the 3-fold domains were considered.

Two typical description of the Ni<sub>2</sub>C from literatures are presented here, with the Wood’s notations, vector length and the angle against the Ni(111) base vectors. These two expressions have very little difference in the actual parameters of the Ni<sub>2</sub>C: a unit lattice of about twice of the Ni–Ni distance in Ni(111), and the angle of about 2.6° and 94.1° against the Ni–Ni direction. The simulated diffraction patterns are close to the measured pattern as shown in **Figure S2**.

Nature 1969:  $\sqrt{39}R16.1^\circ \times \sqrt{39}R16.1^\circ$ ; from Ref. 1

$a = 4.98 \text{ \AA} = 2.00 \text{ r}_0$ ,  $b = 4.86 \text{ \AA} = 1.95 \text{ r}_0$ ,

$\gamma = 94.1^\circ$ ,  $\theta = 2.6^\circ$

ACSNano2012:  $\sqrt{39}R16.1^\circ \times \sqrt{37}R - 34.7^\circ$ ; from Ref. 2

$a = 4.86 \text{ \AA} = 1.95 \text{ r}_0$ ,  $b = 5.06 \text{ \AA} = 2.03 \text{ r}_0$ ,

$\gamma = 94.72^\circ$ ,  $\theta = 2.83^\circ$

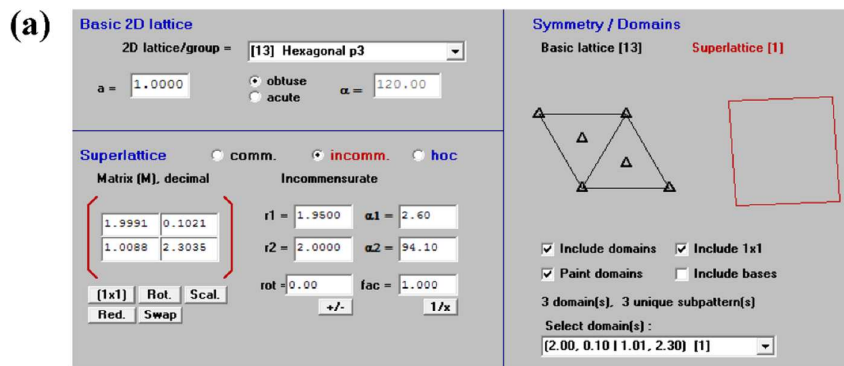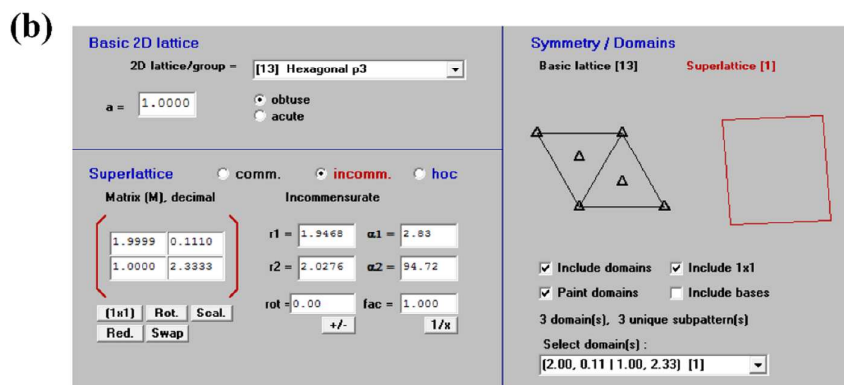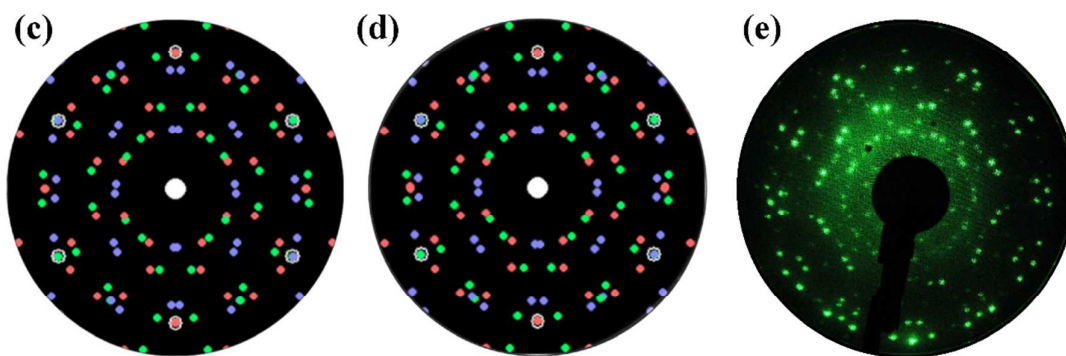

**Figure S2.** Parameters (a, b) and simulated LEED patterns (c, d) of the clock-reconstructed  $\text{Ni}_2\text{C}$  on Ni(111) from Reference 1 and Reference 2, respectively. The measured pattern in (e) was obtained at 70 eV beam energy.

**4. Schematic drawing of inclined C–H bond, an explanation to the LEED pattern of the \*CH adsorbates.**

The ring-like  $\sqrt{3} \times \sqrt{3}$  LEED pattern of the sample after CH<sub>4</sub> exposure at 300 K was inferred from the inclined C–H bond, as shown in Figure S3. The reason for the ring-type diffraction (rather than spots) was inferred from the non-perpendicular C–H bonds with a (probably) fixed zenith angle and randomly distributed azimuth angles. For the 70-eV electron beam, the angle between the (01)–beam and the z-axis is  $\sim 42.8^\circ$ . By comparing the diameter of the diffraction ring to the (01) vector of Ni(111), the effect zenith angle of the C–H bond was estimated as  $8.7^\circ$ .

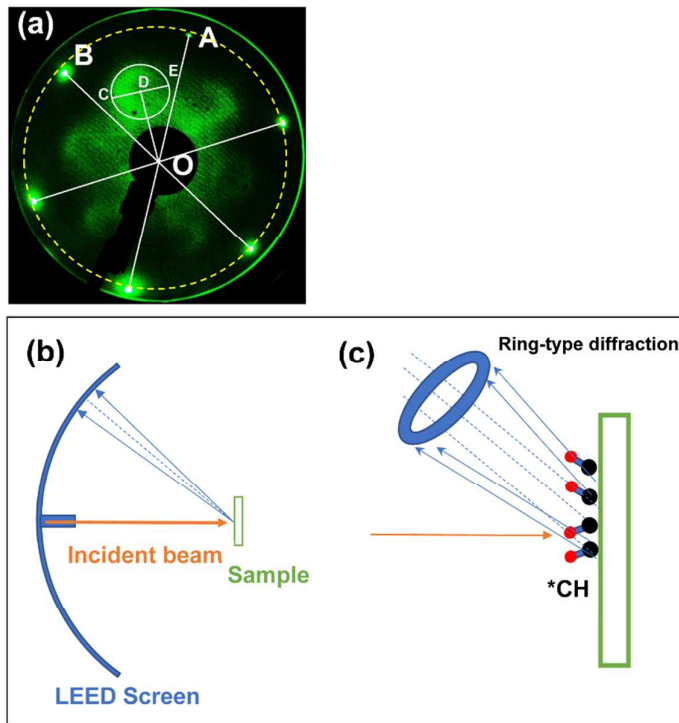

**Figure S3.** (a) Measured LEED pattern after CH<sub>4</sub> exposure at 300 K; (b, c) Schematic explanation of the formation of ring-like

For the 70 eV electron beam, its wavelength can be calculated using the De Broglie formula:

$$\lambda = \frac{h}{p} = \frac{6.62607 \times 10^{-34} \text{ J}\cdot\text{s}}{\sqrt{2E \cdot m_e}} = \frac{6.62607 \times 10^{-34} \text{ J}\cdot\text{s}}{\sqrt{2 \times 70 \text{ eV} \cdot 9.10938356 \times 10^{-31} \text{ kg}}} = 1.466 \times 10^{-10} \text{ m}$$

Knowing that the Ni–Ni distance of  $2.49 \times 10^{-10}$  m, the angle between the (01) diffraction beam of Ni(111) and the normal  $\mathbf{n}$ , can be calculated:

$$\lambda = d \cdot \sin(\theta) = \frac{2.49 \text{Å} \times \sqrt{3}}{2} \cdot \sin(\theta) = 1.466 \text{Å}$$

$$\Rightarrow \angle nOA = \theta = 42.8^\circ,$$

$$\frac{2.49 \text{Å} \times 3}{2} \cdot \sin(\angle nOD) = 1.466 \text{Å}, \Rightarrow \angle nOD = 23.1^\circ$$

The measured CD:DO in panel (a) is 1:2.66. Therefore, the  $\angle COD$  is about  $8.7^\circ$ , indicating that the C–H bond has deviated  $\sim 8.7^\circ$  (effective) from the normal.

## 5. O<sub>2</sub> probing test on the nickel surfaces covered by pre-treated carbon species

The clean Ni(111) was first exposed to 0.4 mbar CH<sub>4</sub> at various temperatures (300–900 K). After cooling to room temperature and evacuating to UHV, it was characterized by UPS. Then  $1 \times 10^{-7}$  mbar O<sub>2</sub> was introduced, and the UPS characterization continued. **Figure S4** (a–e) show the time-resolved UPS spectra. The reduce of d-band electronic state near Fermi Edge, and the increase of O 2p are the general feature during the O<sub>2</sub> exposure. In panel (f), the intensity at 0.168 eV binding energy was plotted as a function of O<sub>2</sub> dosage. The \*CH covered sample (300 K) showed delayed oxidation, while others were oxidized immediately after O<sub>2</sub> dosing. This reflects the reactivity of carbon species (\*CH, Ni<sub>3</sub>C, \*C<sub>n</sub> and Ni<sub>2</sub>C) towards O<sub>2</sub>. It is noted that the sample after 400 K CH<sub>4</sub> dosing were characterized by LEED prior to the O<sub>2</sub> dosing. The UPS spectra shrank after electron beam bombardment, and the initial oxidation rate of the 400 K sample became slower. For the graphene covered sample, no change in the valence band was observed, and therefore are not shown here.

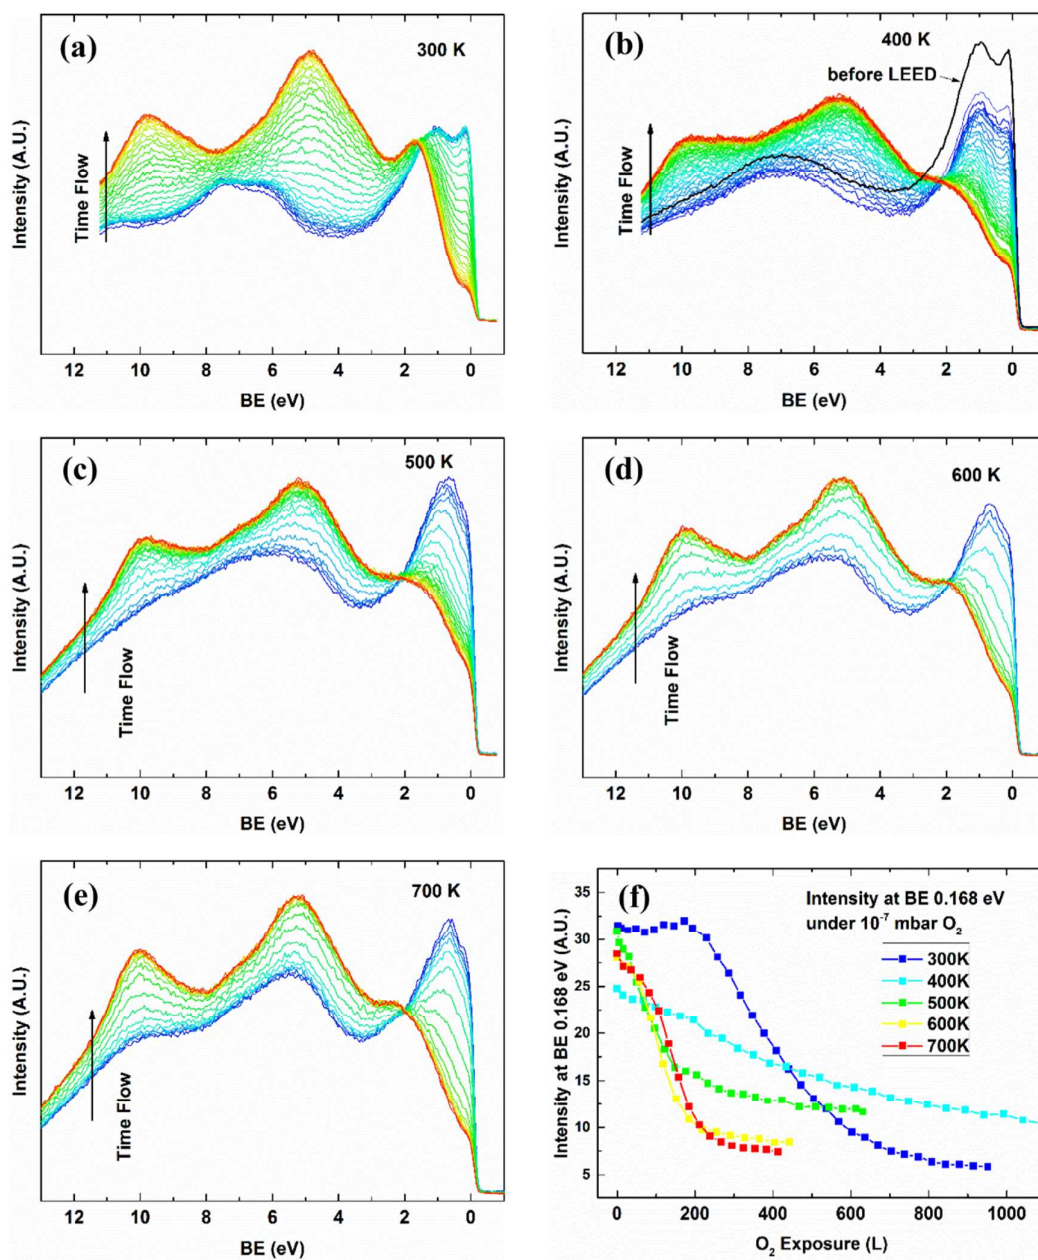

**Figure S4.** (a–e) Time resolved UPS spectra during O<sub>2</sub> dosing in  $1 \times 10^{-7}$  mbar O<sub>2</sub>, at 300 K, after CH<sub>4</sub> pre-treatment at various temperatures. (f) The intensity at the binding energy of 0.168 eV below Fermi Edge, plotted against the O<sub>2</sub> dosage in Langmuir.



## 6. Comparison of activation energies for CH<sub>4</sub> dissociation on Ni(111)

Table S 2 lists the reported activation energies and sticking probabilities (in black) for CH<sub>4</sub> on Ni(111). For easier comparison, they were converted to the sticking probability at 300 K or activation energy **in bold (conv.)** using the following equations:

$$S(T) = e^{-E_a/k_B T}$$

**Table S2.** Some reported activation energies for CH<sub>4</sub> dissociation on Ni(111).

| Apparent<br>E <sub>a</sub> (eV)      | Sticking Probability                                                                                                                                               | Remarks                                                 | Ref. (Year) |
|--------------------------------------|--------------------------------------------------------------------------------------------------------------------------------------------------------------------|---------------------------------------------------------|-------------|
| <b>0.879 (conv.)</b>                 | 4×10 <sup>-8</sup> at 600K<br><b>1.7×10<sup>-15</sup> at 300 K (conv.)</b>                                                                                         | 1.33 mbar, bulb experiment (uneven heating might exist) | 3 (1991)    |
| 0.546                                | <b>6.7×10<sup>-10</sup> at 300K (conv.)</b>                                                                                                                        | 1.33 mbar                                               | 4 (1987)    |
| <b>0.767 (conv.)</b>                 | <b>1.3×10<sup>-13</sup> at 300K (conv.)</b><br>1.3×10 <sup>-8</sup> at 500K (meas.)                                                                                | <10 <sup>-2</sup> mbar, using a thermal finger          | 5 (2002)    |
| <b>0.516 (conv.)</b>                 | 1.5×10 <sup>-9</sup> beam energy 0.73 eV<br><b>2.1×10<sup>-9</sup> at 300K (conv.)</b>                                                                             | Molecular beam                                          | 6 (1986)    |
| 0.718                                | <b>8.6×10<sup>-13</sup> at 300K (conv.)</b>                                                                                                                        | Ab initial                                              | 7 (1992)    |
| 0.649 (steps)<br><br>0.859 (terrace) | 2.8×10 <sup>-7</sup> at 500K<br><b>1.3×10<sup>-11</sup> at 300K (conv.)</b><br>2.1×10 <sup>-9</sup> at 500K (meas.)<br><b>3.7×10<sup>-15</sup> at 300K (conv.)</b> | 0.01 mbar, thermal finger at 500K                       | 8 (2005)    |
| 1.31                                 | <b>9.8×10<sup>-23</sup> at 300K (conv.)</b>                                                                                                                        | DFT                                                     | 9 (2012)    |

## REFERENCES

- (1) McCarroll, J. J.; Edmonds, T.; Pitkethly, R. C. *Nature* **1969**, 223, 1260.
- (2) Jacobson, P.; Stöger, B.; Garhofer, A.; Parkinson, G. S.; Schmid, M.; Caudillo, R.; Mittendorfer, F.; Redinger, J.; Diebold, U. *ACS Nano* **2012**, 6, 3564.
- (3) Hanley, L.; Xu, Z.; Yates, J. T. *Surf. Sci. Lett.* **1991**, 248, L265.
- (4) Jr., T. P. B.; Goodman, D. W.; Kay, B. D.; Jr., J. T. Y. *J. Chem. Phys.* **1987**, 87, 2305.
- (5) Egeberg, R. C.; Ullmann, S.; Alstrup, I.; Mullins, C. B.; Chorkendorff, I. *Surf. Sci.* **2002**, 497, 183.
- (6) Lee, M. B.; Yang, Q. Y.; Tang, S. L.; Ceyer, S. T. *J. Chem. Phys.* **1986**, 85, 1693.
- (7) Yang, H.; Whitten, J. L. *J. Chem. Phys.* **1992**, 96, 5529.
- (8) Abild-Pedersen, F.; Lytken, O.; Engbæk, J.; Nielsen, G.; Chorkendorff, I.; Nørskov, J. K. *Surf. Sci.* **2005**, 590, 127.
- (9) Li, J.; Croiset, E.; Ricardez-Sandoval, L. *J. Mol. Catal. A: Chem.* **2012**, 365, 103.
